# Supplementary material
Source: PubMed Central journal article supplement (PMC4970463)
Supplement: NIHMS806384-supplement-Supplemental.pdf [file NIHMS806384-supplement-Supplemental.pdf]

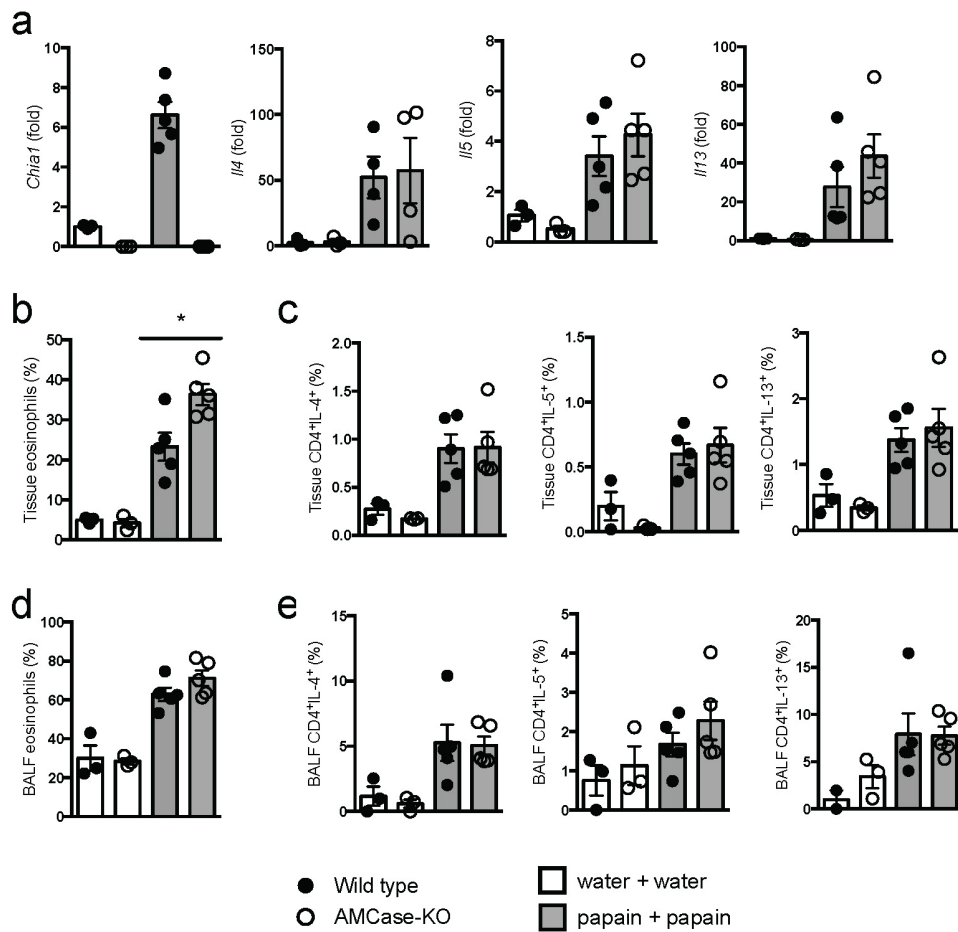

### Supplementary Figure 1

#### Acute model of papain-induced type 2 allergic inflammation in the lung.

(a) Quantitative PCR analysis of gene expression in lung tissue from wild type mice or AMCCase-KO mice sensitized and challenged intranasally with PBS ( $n = 3$  mice per genotype) or papain ( $n = 5$  mice per genotype) expressed relative to water-treated wild type. (b) Quantification of eosinophils in lung tissue of mice in a (PBS:  $n = 3$ , papain:  $n = 5$ ). (c) Intracellular cytokine analysis of lung tissue lymphocytes of mice in a (PBS:  $n = 3$ , HDM:  $n = 5$ ). (d) Quantification of eosinophils in BALF of mice in a (PBS:  $n = 3$ , HDM:  $n = 5$ ). (e) Intracellular cytokine analysis of BALF lymphocytes of mice in a (PBS:  $n = 3$ , HDM:  $n = 5$ ). Error bars represent standard error of the mean, and each data point represents a value for an individual mouse.

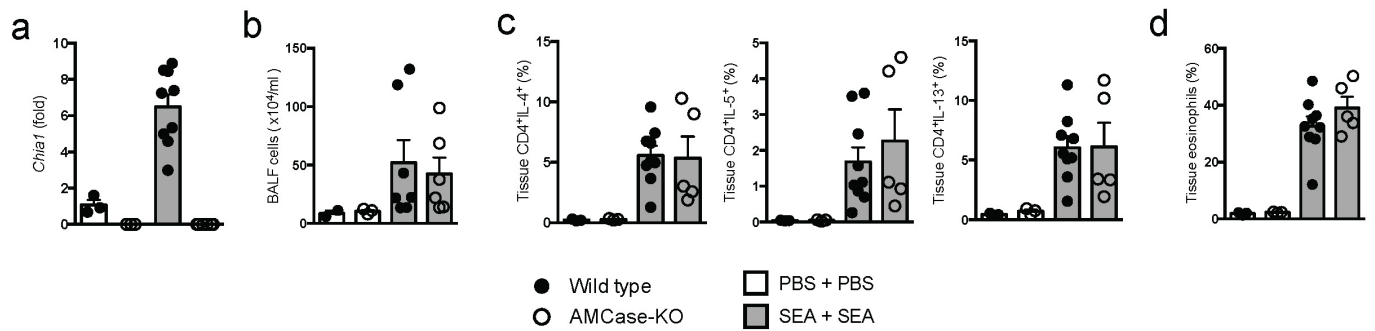

## Supplementary Figure 2

### Acute model of SEA-induced type 2 allergic inflammation in the lung.

(a) Quantitative PCR analysis of gene expression in lung tissue from wild type mice or AMCase-KO mice sensitized and challenged intratracheally with PBS ( $n = 3$  mice per genotype) or schistosoma egg antigen (SEA) ( $n = 9$  mice per genotype) expressed relative to PBS-treated wild type. (b) Quantification of leukocytes in BALF of mice in a (PBS:  $n = 3$ , SEA:  $n = 6$ ). (c) Intracellular cytokine analysis of lung tissue lymphocytes of mice in a (PBS:  $n = 3$ , WT/SEA:  $n = 9$ , KO/SEA:  $n = 5$ ). (d) Quantification of eosinophils in lung tissue of mice in a (PBS:  $n = 3$ , WT/SEA:  $n = 9$ , KO/SEA:  $n = 5$ ). Data are representative of three experiments with similar results. Error bars represent standard error of the mean, and each data point represents a value for an individual mouse.

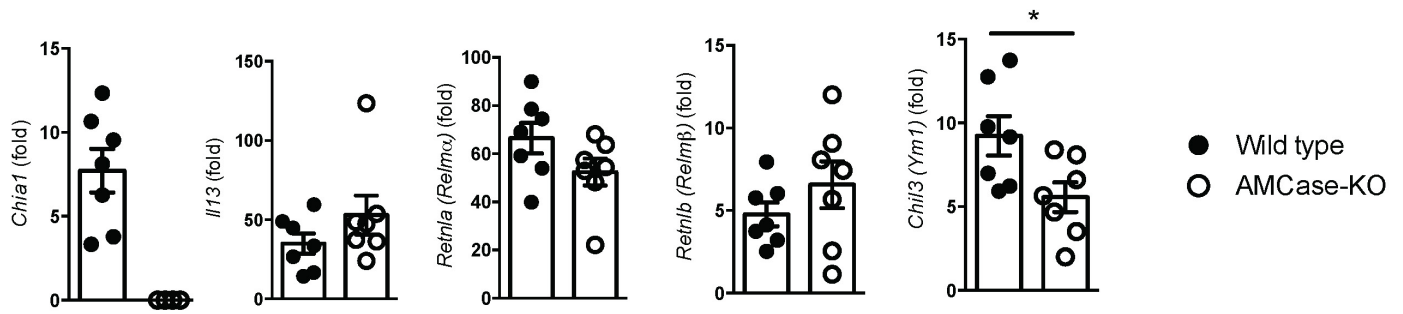

### Supplementary Figure 3

#### Gene expression in lung tissue during *N. brasiliensis* infection.

Quantitative PCR analysis of gene expression in lung tissue from wild type mice ( $n = 7$ ) or AMCase-KO mice ( $n = 7$ ) 8 days after primary infection with *N. brasiliensis*. Data shown relative to expression in lung tissue from naïve mice. \* $P < 0.05$  (Student's  $t$ -test). Data are representative of two experiments with similar results. Error bars represent standard error of the mean, and each data point represents a value for an individual mouse.

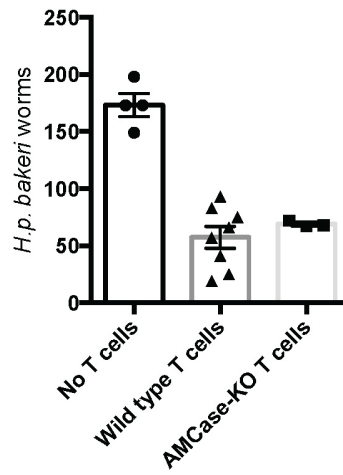

#### Supplementary Figure 4

**Wild type and AMCase-deficient T cells are equally competent at clearing *H.p. bakeri* infection.**

Quantification of *H.p. bakeri* worms recovered from intestines of TCR $\alpha$  KO mice that were recipients of  $2 \times 10^5$  T cells from previously infected wild type mice (triangles,  $n = 8$ ),  $2 \times 10^5$  T cells from previously infected AMCase-KO mice (squares,  $n = 3$ ), or no T cells (circles,  $n = 4$ ).

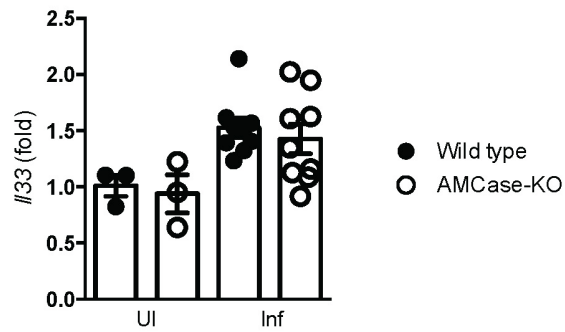

**Supplementary Figure 5**

*Il33* expression in small intestine tissue 3.5 days after primary *H. p. bakeri* infection.

Quantitative PCR analysis of *Il33* expression in proximal small intestine tissue from wild type mice or AMCase-KO mice 3.5 days post-infection ( $n = 9$  per genotype) or from uninfected wild type or AMCase-KO ( $n = 3$  per genotype). Error bars represent standard error of the mean, and each data point represents a value for an individual mouse.
